# Supplementary material for: Nucleosomal DNA has topological memory
Source: Research Square preprint supplement (doi:10.21203/rs.3.rs-3013615/v1), 2023-07-04
Supplement: Supplementary file 1 [file 1f1d9bd1c22b637532f5e5b9.pdf]

# **Extended Data**

## **Nucleosomal DNA has topological memory**

Joana Segura, Christoforos Nikolaou, Joaquim Roca

**Extended Data Fig. 1**

**Extended Data Fig. 2**

**Extended Data Fig. 3**

**Extended Data Fig. 4**

**Extended Data Fig. 5**

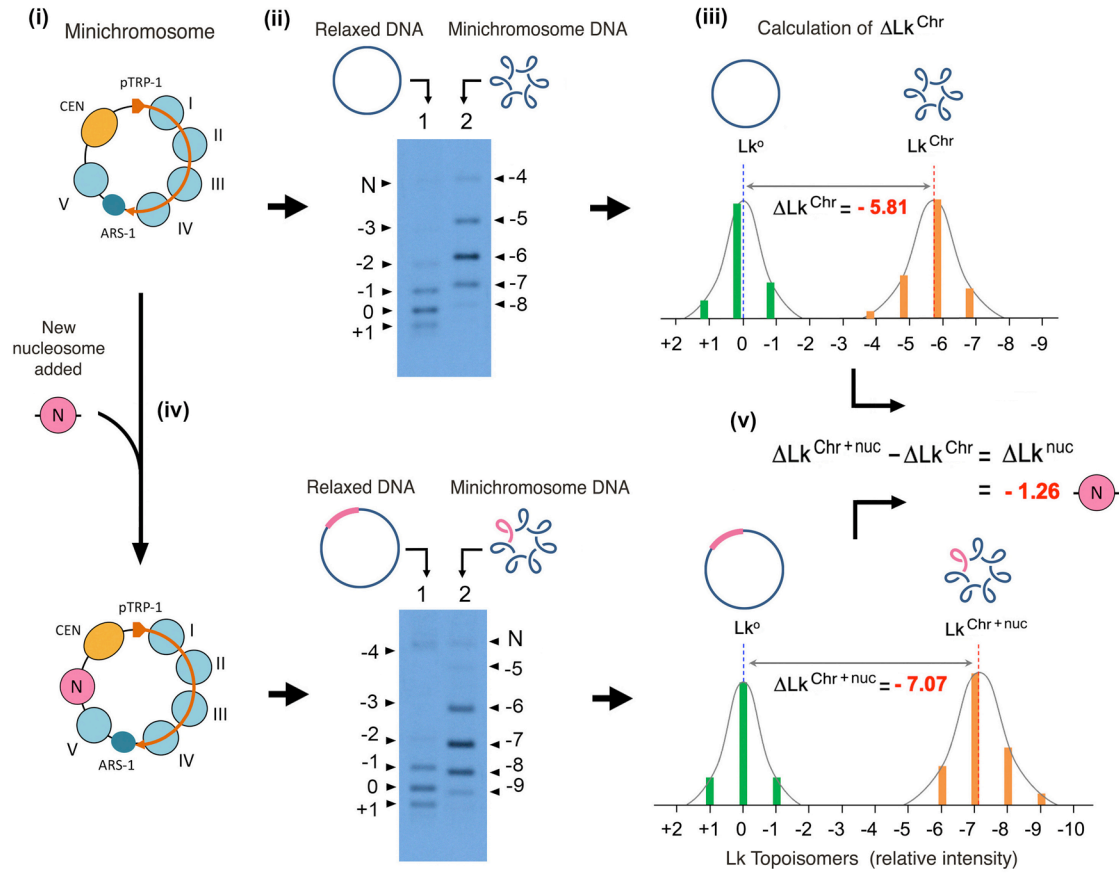

**Extended Data Fig. 1. Experimental layout to calculate the  $\Delta Lk$  restrained by nucleosomes *in vivo*.** In a circular minichromosome (i), the DNA linking number difference constrained by its chromatin elements ( $\Delta Lk^{Chr}$ ) is calculated by comparing, via gel electrophoresis (ii), the Gaussian distribution of Lk topoisomers of the DNA relaxed *in vitro* (lane 1) with that of the minichromosome DNA fixed *in vivo* (lane 2). The Lk mean of the relaxed DNA ( $Lk^0$ ) and that of the minichromosome DNA ( $Lk^{Chr}$ ) are determined by plotting the intensities of their corresponding Lk topoisomers along a scale of  $\Delta Lk$  units (iii).  $\Delta Lk^{Chr}$  is the distance in Lk units between the two means ( $Lk^0 - Lk^{Chr} = \Delta Lk^{Chr}$ ). Upon adding a new nucleosome to such minichromosome (iv), the process is repeated to calculate  $\Delta Lk^{Chr+nuc}$ . The resulting difference between  $\Delta Lk^{Chr}$  and  $\Delta Lk^{Chr+nuc}$  equals  $\Delta Lk^{nuc}$ , the  $\Delta Lk$  restrained by the new nucleosome (v).  $\Delta Lk^{nuc}$  is about -1.26 for most nucleosomes, as previously reported by Segura *et al* (2018).

**a**

Adaptor with *Bam*H1 cohesive-end ligatable but not recutable

```
5'      *GGACGATTACAGCTACGTG      3'
3'      TCCTGCTAATGTCGATGCACCTAG  5'
```

Adaptor with *Asc*I cohesive-end ligatable but not recutable

```
5'      *CGTTCGGATCCGTTTAAACGTGAAGAGGTAACAT      3'
3'      TGCAAGCCTAGGCAAATTTGCACTTCTCCATTGAGTAGCGC  5'
```

**b**

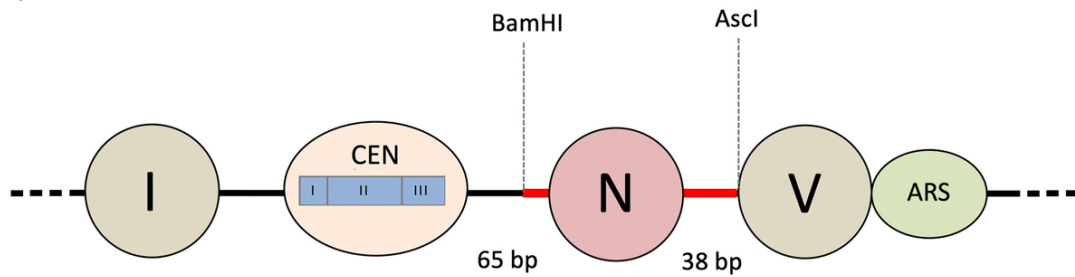

**Extended Data Fig. 2. Insertion of the nucleosome library into YCp1.3.** **a**, DNA adaptors ligated to A-tailed nucleosome DNA fragments to generate *Bam*H1 and *Asc*I cohesive ends. **b**, Position of the nucleosome library between nucleosome V and CEN2 of YCp1.3. The lengths (bp) of the resulting linker DNA segments are indicated.

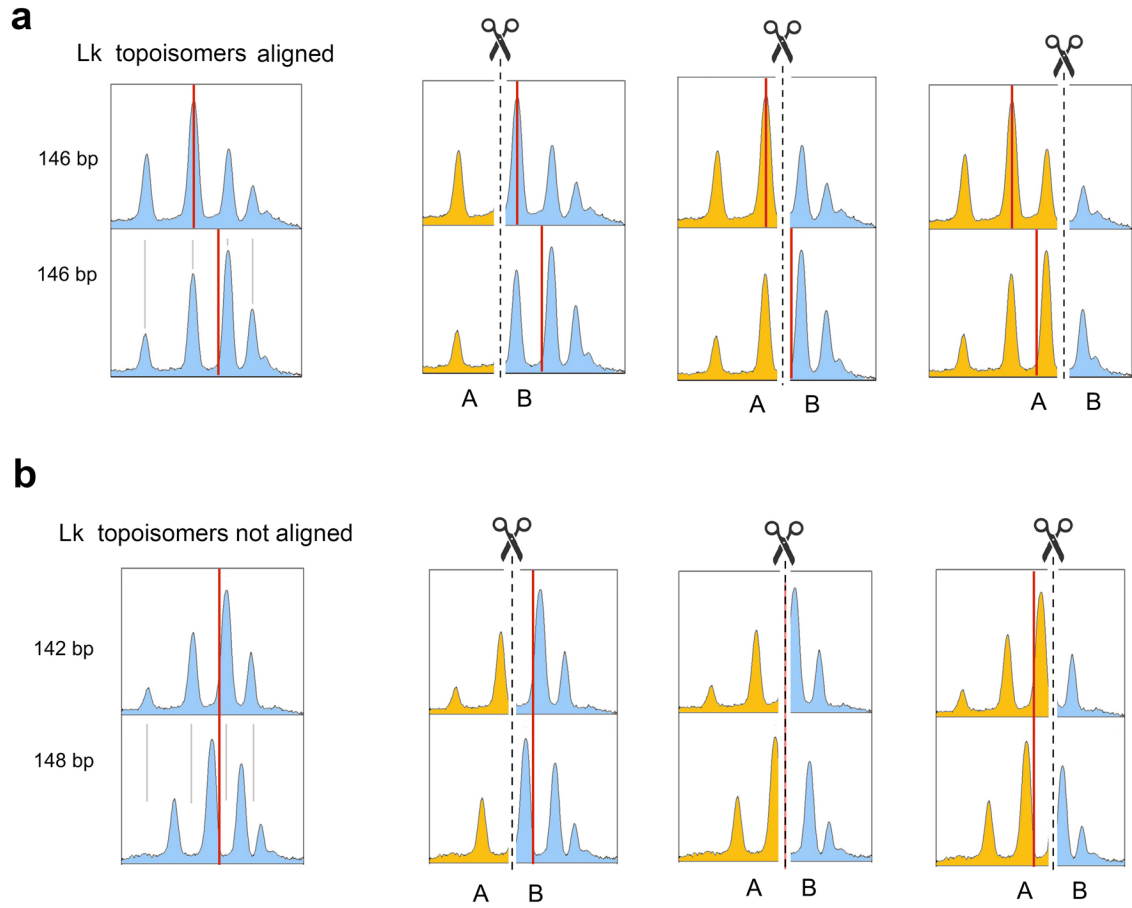

**Extended Data Fig. 3. Effect of aligned and non-aligned Lk distributions when conducting Topo-seq. a,** Example of two Lk distributions with different Lk mean (red lines), but with aligned topoisomers, since the DNA fragments of the nucleosome library have equal length (146 bp). Note that, whatever the position of a splitting cut (3 examples depicted), the partition of DNA intensities (coloured areas A and B) always denotes that the two distributions have different Lk mean. **b,** Example of two Lk distributions with equal Lk mean (red lines) but with not aligned topoisomers because the DNA fragments of the nucleosome library have different lengths (142 and 148 bp). In this case, depending on the position of the splitting cut, the partition of DNA intensities does not always denote that the two distributions have equal Lk mean.

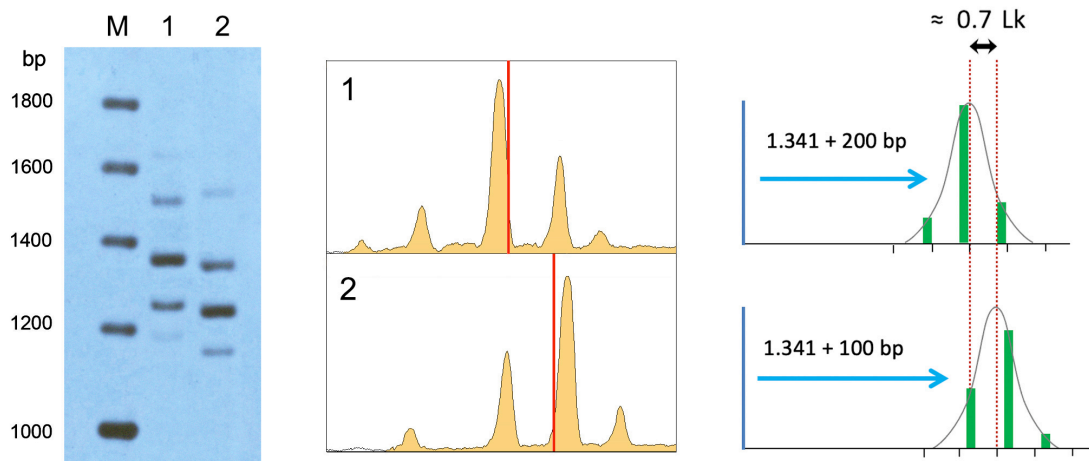

**Extended Data Fig. 4. Correlation of DNA length with the electrophoretic velocity of Lk distributions.**

Left, the gel shows a marker of linear DNAs (M) and the Lk distributions of two relaxed DNA molecules differing in 100 bp in length. These molecules are the YCp1.3 minichromosome DNA (1.341 bp) with an insert of 100 bp (lane 1) and 200 bp (lane 2). Note that the size of these inserts encloses the length variability of the nucleosome library ( $144 \pm 33$ bp). Middle, densitometry of lanes 1 and 2 indicating the position of the Lk means (red lines). Right, the distance of the Lk means of these DNAs differing in 100 bp was equivalent to 0.7 Lk units, thus 0.007 Lk/bp.

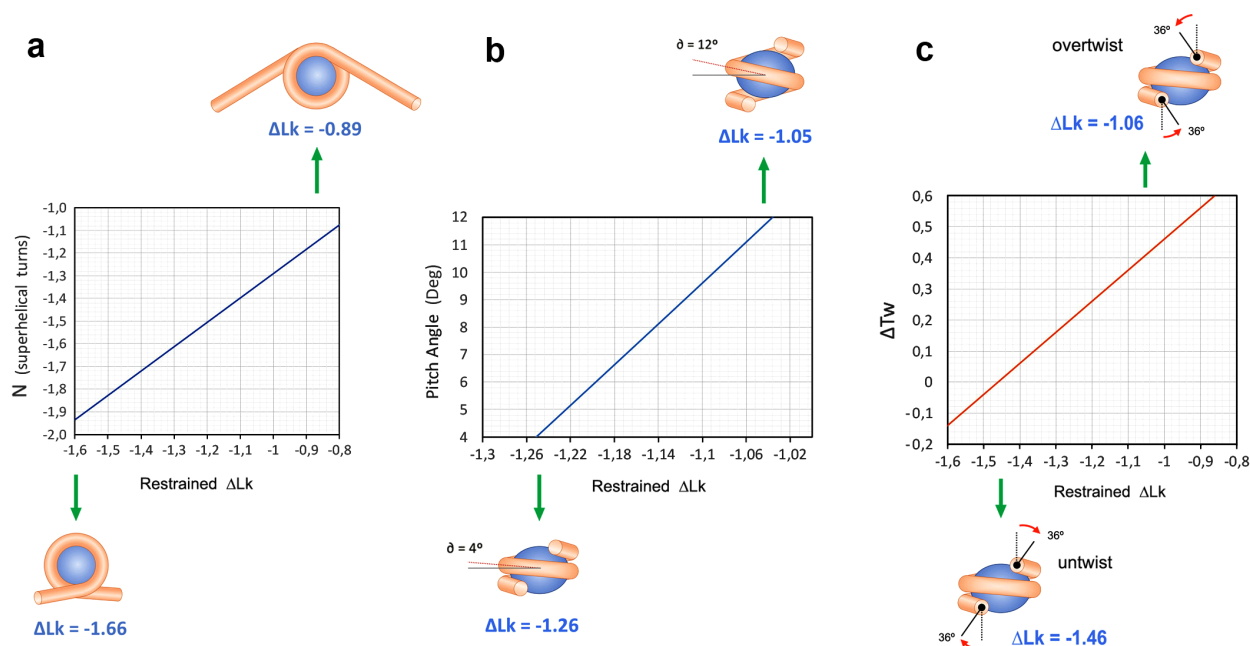

**Extended Data Fig. 5. Effect of nucleosome DNA wrapping ( $\Delta W_r$ ) and twisting ( $\Delta T_w$ ) on the restrained  $\Delta Lk$ .** **a**, Plot of restrained  $\Delta Lk$  as a function of the number of DNA super-helical turns ( $N$ ) wrapped in the nucleosome.  $\Delta Lk$  values are calculated as  $\Delta T_w + \Delta W_r$ , where  $\Delta T_w = +0.2$  and  $\Delta W_r = N(1 - \sin 4^\circ)$ . **b**, Plot of restrained  $\Delta Lk$  as a function of the pitch angle ( $\theta$ ) of the super-helical turns wrapped in the nucleosome.  $\Delta Lk$  values are calculated considering  $\Delta T_w = +0.2$  and  $\Delta W_r = 1.56(1 - \sin \theta)$ . **c**, Plot of restrained  $\Delta Lk$  as a function of the DNA twist ( $\Delta T_w$ ) restrained by the nucleosome.  $\Delta Lk$  values are calculated considering  $\Delta W_r = 1.56(1 - \sin 4^\circ)$ . Nucleosome DNA geometries are modelled for the indicated  $\Delta Lk$ .
